# Supplementary material
Source: HighWire-hosted journal article supplement (https://cmajopen.ca/highwire/filestream/80761/field_highwire_adjunct_files/0/open-2013-0053-01-at.pdf)
Supplement: open-2013-0053-01-at.pdf [file open-2013-0053-01-at.pdf]

## Appendix 1 (as supplied by authors): Supplementary material

### Table of contents

|                                                                             |         |
|-----------------------------------------------------------------------------|---------|
| eTable 1: Diagnostic Categories                                             | Page 2  |
| eTable 2: Hospital Characteristics for Analysis                             | Page 10 |
| eTable 3: Hospital Characteristics for Description                          | Page 11 |
| eTable 4: Diagnostic Category Frequency for Primary Hospitalization         | Page 12 |
| eTable 5: Diagnostic Category Frequency for Secondary Hospitalization       | Page 13 |
| eTable 6: Secondary Hospital Characteristics                                | Page 14 |
| eTable 7: Diagnosis as Predictor of 30-day Mortality                        | Page 15 |
| eTable 8: Primary Analysis Stratified by Secondary Hospital                 | Page 16 |
| eTable 9: Primary Analysis Stratified by Hospital Transitions               | Page 17 |
| eTable 10: Primary Analysis, Without Adjustment, Stratified on Diagnosis    | Page 18 |
| eTable 11: Analysis of Secondary Outcomes                                   | Page 19 |
| eTable 12: Influence of an Unmeasured Confounder (HR 2.0)                   | Page 20 |
| eFigure 1: Study Schematic                                                  | Page 21 |
| eFigure 2: Hospital Flow Diagram                                            | Page 22 |
| eFigure 3: Frequency Table for the Number of Eligible Hospital Readmissions | Page 23 |
| eFigure 4: Comparing Primary and Secondary Hospital Stratification          | Page 24 |

**eTable 1: Diagnostic Categories**

| <b>Category</b>                 | <b>Clinical Classifications Software (CCS)<sup>37</sup> Components</b>                                                                                                                                    |
|---------------------------------|-----------------------------------------------------------------------------------------------------------------------------------------------------------------------------------------------------------|
| Nonspecific abdominal pain      | Abdominal pain                                                                                                                                                                                            |
| Acute coronary syndrome         | Acute myocardial infarction                                                                                                                                                                               |
| Acute renal failure             | Acute and unspecified renal failure                                                                                                                                                                       |
| Appendicitis                    | Appendicitis and other appendiceal conditions                                                                                                                                                             |
| Cardiac dysrhythmias            | Conduction disorders<br>Cardiac dysrhythmias                                                                                                                                                              |
| Biliary tract disease           | Biliary tract disease                                                                                                                                                                                     |
| Cardiac arrest                  | Cardiac arrest and ventricular fibrillation                                                                                                                                                               |
| Cerebrovascular disease         | Acute cerebrovascular disease<br>Occlusion or stenosis of precerebral arteries<br>Other and ill-defined cerebrovascular disease<br>Transient cerebral ischemia<br>Late effects of cerebrovascular disease |
| Nonspecific chest pain          | Nonspecific chest pain                                                                                                                                                                                    |
| Chronic ischemic heart disease  | Coronary atherosclerosis and other heart disease                                                                                                                                                          |
| Diabetes                        | Diabetes mellitus without complication<br>Diabetes mellitus with complications                                                                                                                            |
| Diverticular disease            | Diverticulosis and diverticulitis                                                                                                                                                                         |
| Fluid and electrolyte imbalance | Fluid and electrolyte disorders                                                                                                                                                                           |
| Gastrointestinal hemorrhage     | Gastrointestinal hemorrhage<br>Gastroduodenal ulcer (except hemorrhage)                                                                                                                                   |
| Heart failure                   | Congestive heart failure; nonhypertensive                                                                                                                                                                 |
| Infections of the skin          | Skin and subcutaneous tissue infections                                                                                                                                                                   |
| Inflammatory bowel disease      | Regional enteritis and ulcerative colitis                                                                                                                                                                 |

**eTable 1: Diagnostic Categories (continued)**

| Category | Clinical Classifications Software (CCS) <sup>37</sup> Components                                                                                                                                                                                                                                                                                                                                                                                                                                                                                                                                                                                                                                                                                                                                                                                                                                                                                                                                                                                                                                                                                                                                                                                                                                                                                                                                                                                                                                                                                   |
|----------|----------------------------------------------------------------------------------------------------------------------------------------------------------------------------------------------------------------------------------------------------------------------------------------------------------------------------------------------------------------------------------------------------------------------------------------------------------------------------------------------------------------------------------------------------------------------------------------------------------------------------------------------------------------------------------------------------------------------------------------------------------------------------------------------------------------------------------------------------------------------------------------------------------------------------------------------------------------------------------------------------------------------------------------------------------------------------------------------------------------------------------------------------------------------------------------------------------------------------------------------------------------------------------------------------------------------------------------------------------------------------------------------------------------------------------------------------------------------------------------------------------------------------------------------------|
| Injury   | Joint disorders and dislocations; trauma-related<br>Fracture of neck of femur (hip)<br>Spinal cord injury<br>Skull and face fractures<br>Fracture of upper limb<br>Fracture of lower limb<br>Other fractures<br>Sprains and strains<br>Intracranial injury<br>Crushing injury or internal injury<br>Open wounds of head; neck; and trunk<br>Open wounds of extremities<br>Complication of device; implant or graft<br>Complications of surgical procedures or medical care<br>Superficial injury; contusion<br>Burns<br>Poisoning by psychotropic agents<br>Poisoning by other medications and drugs<br>Poisoning by nonmedicinal substances<br>Suicide and intentional self-inflicted injury [ICD-9CM CCS only]<br>Other injuries and conditions due to external causes<br>E Codes: All (external causes of injury and poisoning)<br>E Codes: Cut/pierce<br>E Codes: Drowning/submersion<br>E Codes: Fall<br>E Codes: Fire/burn<br>E Codes: Firearm<br>E Codes: Machinery<br>E Codes: Motor vehicle traffic (MVT)<br>E Codes: Pedal cyclist; not MVT<br>E Codes: Pedestrian; not MVT<br>E Codes: Transport; not MVT<br>E Codes: Natural/environment<br>E Codes: Overexertion<br>E Codes: Poisoning<br>E Codes: Struck by; against<br>E Codes: Suffocation<br>E Codes: Adverse effects of medical care<br>E Codes: Adverse effects of medical drugs<br>E Codes: Other specified and classifiable<br>E Codes: Other specified; NEC [ICD-9CM CCS only]<br>E Codes: Unspecified [ICD-9CM CCS only]<br>E Codes: Place of occurrence [ICD-9CM CCS only] |

**eTable 1: Diagnostic Categories (continued)**

| <b>Category</b>          | <b>Clinical Classifications Software (CCS)<sup>37</sup> Components</b>                                                                                                                                                                                                                                                                                                                                                                                                                                                                                                                                                                                                                                              |
|--------------------------|---------------------------------------------------------------------------------------------------------------------------------------------------------------------------------------------------------------------------------------------------------------------------------------------------------------------------------------------------------------------------------------------------------------------------------------------------------------------------------------------------------------------------------------------------------------------------------------------------------------------------------------------------------------------------------------------------------------------|
| Intestinal obstruction   | Intestinal obstruction without hernia<br>Abdominal hernia [only those codes that specify intestinal obstruction]                                                                                                                                                                                                                                                                                                                                                                                                                                                                                                                                                                                                    |
| Liver disease            | Liver disease; alcohol-related<br>Other liver diseases<br>Hepatitis                                                                                                                                                                                                                                                                                                                                                                                                                                                                                                                                                                                                                                                 |
| Nephrolithiasis          | Calculus of urinary tract                                                                                                                                                                                                                                                                                                                                                                                                                                                                                                                                                                                                                                                                                           |
| Obstructive lung disease | Chronic obstructive pulmonary disease and bronchiectasis<br>Asthma                                                                                                                                                                                                                                                                                                                                                                                                                                                                                                                                                                                                                                                  |
| Pneumonia                | Pneumonia (except that caused by tuberculosis or sexually transmitted disease)<br>Influenza<br>Aspiration pneumonitis; food/vomitus                                                                                                                                                                                                                                                                                                                                                                                                                                                                                                                                                                                 |
| Prostatic hypertrophy    | Hyperplasia of prostate                                                                                                                                                                                                                                                                                                                                                                                                                                                                                                                                                                                                                                                                                             |
| Sepsis                   | Septicemia (except in labor)                                                                                                                                                                                                                                                                                                                                                                                                                                                                                                                                                                                                                                                                                        |
| Syncope                  | Syncope                                                                                                                                                                                                                                                                                                                                                                                                                                                                                                                                                                                                                                                                                                             |
| Urinary tract infection  | Urinary tract infections                                                                                                                                                                                                                                                                                                                                                                                                                                                                                                                                                                                                                                                                                            |
| Venous thromboembolism   | Phlebitis; thrombophlebitis and thromboembolism                                                                                                                                                                                                                                                                                                                                                                                                                                                                                                                                                                                                                                                                     |
| Malignant neoplasm       | Cancer of head and neck<br>Cancer of esophagus<br>Cancer of stomach<br>Cancer of colon<br>Cancer of rectum and anus<br>Cancer of liver and intrahepatic bile duct<br>Cancer of pancreas<br>Cancer of other GI organs; peritoneum<br>Cancer of bronchus; lung<br>Cancer; other respiratory and intrathoracic<br>Cancer of bone and connective tissue<br>Melanomas of skin<br>Cancer of breast<br>Cancer of uterus<br>Cancer of cervix<br>Cancer of ovary<br>Cancer of other female genital organs<br>Cancer of prostate<br>Cancer of testis<br>Cancer of other male genital organs<br>Cancer of bladder<br>Cancer of kidney and renal pelvis<br>Cancer of other urinary organs<br>Cancer of brain and nervous system |

**eTable 1: Diagnostic Categories (continued)**

| Category                       | Clinical Classifications Software (CCS) <sup>37</sup> Components                                                                                                                                                                                                                                                                                                                                                                                                                                                                                                                                                                                                                                                                                                                                                                            |
|--------------------------------|---------------------------------------------------------------------------------------------------------------------------------------------------------------------------------------------------------------------------------------------------------------------------------------------------------------------------------------------------------------------------------------------------------------------------------------------------------------------------------------------------------------------------------------------------------------------------------------------------------------------------------------------------------------------------------------------------------------------------------------------------------------------------------------------------------------------------------------------|
| Malignant neoplasm (continued) | Cancer of thyroid<br>Hodgkin`s disease<br>Non-Hodgkin`s lymphoma<br>Leukemias<br>Multiple myeloma<br>Cancer; other and unspecified primary<br>Secondary malignancies<br>Malignant neoplasm without specification of site<br>Neoplasms of unspecified nature or uncertain behavior<br>Maintenance chemotherapy; radiotherapy                                                                                                                                                                                                                                                                                                                                                                                                                                                                                                                 |
| Miscellaneous                  | Overall<br>No diagnosis<br>Invalid diagnosis<br>Tuberculosis<br>Bacterial infection; unspecified site<br>Mycoses<br>HIV infection<br>Viral infection<br>Other infections; including parasitic<br>Sexually transmitted infections (not HIV or hepatitis)<br>Immunizations and screening for infectious disease<br>Thyroid disorders<br>Benign neoplasm of uterus<br>Other and unspecified benign neoplasm<br>Other endocrine disorders<br>Nutritional deficiencies<br>Disorders of lipid metabolism<br>Gout and other crystal arthropathies<br>Cystic fibrosis<br>Immunity disorders<br>Other nutritional; endocrine; and metabolic disorders<br>Deficiency and other anemia<br>Acute posthemorrhagic anemia<br>Sickle cell anemia<br>Coagulation and hemorrhagic disorders<br>Diseases of white blood cells<br>Other hematologic conditions |

**eTable 1: Diagnostic Categories (continued)**

| Category                  | Clinical Classifications Software (CCS) <sup>37</sup> Components                                                                                                                                                                                                                                                                                                                                                                                                                                                                                                                                                                                                                                                                                                                                                                                                                                                                                                                                                                                                                                                                                                                                                                                                                                                                                                                                                                                                                                                                                                                                                                                                                                                                                                                                                                                                                                                                                                                           |
|---------------------------|--------------------------------------------------------------------------------------------------------------------------------------------------------------------------------------------------------------------------------------------------------------------------------------------------------------------------------------------------------------------------------------------------------------------------------------------------------------------------------------------------------------------------------------------------------------------------------------------------------------------------------------------------------------------------------------------------------------------------------------------------------------------------------------------------------------------------------------------------------------------------------------------------------------------------------------------------------------------------------------------------------------------------------------------------------------------------------------------------------------------------------------------------------------------------------------------------------------------------------------------------------------------------------------------------------------------------------------------------------------------------------------------------------------------------------------------------------------------------------------------------------------------------------------------------------------------------------------------------------------------------------------------------------------------------------------------------------------------------------------------------------------------------------------------------------------------------------------------------------------------------------------------------------------------------------------------------------------------------------------------|
| Miscellaneous (continued) | Adjustment disorders [ICD-9CM CCS only]<br>Anxiety disorders [ICD-9CM CCS only]<br>Anxiety; somatoform; dissociative; and personality disorders [ICD-10-CM CCS only]<br>Attention-deficit, conduct, and disruptive behavior disorders [ICD-9CM CCS only]<br>Delirium, dementia, and amnesic and other cognitive disorders [ICD-9CM CCS only]<br>Senility and organic mental disorders [ICD-10-CM CCS only]<br>Developmental disorders [ICD-9CM CCS only]<br>Mental retardation [ICD-10-CM CCS only]<br>Disorders usually diagnosed in infancy, childhood, or adolescence [ICD-9CM CCS only]<br>Preadult disorders [ICD-10-CM CCS only]<br>Impulse control disorders, NEC [ICD-9CM CCS only]<br>Mood disorders [ICD-9CM CCS only]<br>Affective disorders [ICD-10-CM CCS only]<br>Personality disorders [ICD-9CM CCS only]<br>Schizophrenia and other psychotic disorders [ICD-9CM CCS only]<br>Schizophrenia and related disorders [ICD-10-CM CCS only]<br>Other psychoses [ICD-10-CM CCS only]<br>Alcohol-related disorders [ICD-9CM CCS only]<br>Alcohol-related mental disorders [ICD-10-CM CCS only]<br>Substance-related disorders [ICD-9CM CCS only]<br>Substance-related mental disorders [ICD-10-CM CCS only]<br>Screening and history of mental health and substance abuse codes [ICD-9CM CCS only]<br>Other mental conditions [ICD-10-CM CCS only]<br>Personal history of mental disorder; mental and behavioral problems; observation and screening for mental condition [ICD-10-CM CCS only]<br>Miscellaneous disorders [ICD-9CM CCS only]<br>Meningitis (except that caused by tuberculosis or sexually transmitted disease)<br>Encephalitis (except that caused by tuberculosis or sexually transmitted disease)<br>Other CNS infection and poliomyelitis<br>Parkinson`s disease<br>Multiple sclerosis<br>Other hereditary and degenerative nervous system conditions<br>Paralysis<br>Epilepsy; convulsions<br>Headache; including migraine<br>Coma; stupor; and brain damage |

**eTable 1: Diagnostic Categories (continued)**

| Category                  | Clinical Classifications Software (CCS) <sup>37</sup> Components                                                                                                                                                                                                                                                                                                                                                                                                                                                                                                                                                                                                                                                                                                                                                                                                                                                                                                                                                                                                                                                                                                                                                                                                                                                                                                                                                                                                                                                                                                                                    |
|---------------------------|-----------------------------------------------------------------------------------------------------------------------------------------------------------------------------------------------------------------------------------------------------------------------------------------------------------------------------------------------------------------------------------------------------------------------------------------------------------------------------------------------------------------------------------------------------------------------------------------------------------------------------------------------------------------------------------------------------------------------------------------------------------------------------------------------------------------------------------------------------------------------------------------------------------------------------------------------------------------------------------------------------------------------------------------------------------------------------------------------------------------------------------------------------------------------------------------------------------------------------------------------------------------------------------------------------------------------------------------------------------------------------------------------------------------------------------------------------------------------------------------------------------------------------------------------------------------------------------------------------|
| Miscellaneous (continued) | Cataract<br>Retinal detachments; defects; vascular occlusion; and retinopathy<br>Glaucoma<br>Blindness and vision defects<br>Inflammation; infection of eye (except that caused by tuberculosis or sexually transmitted disease)<br>Other eye disorders<br>Otitis media and related conditions<br>Conditions associated with dizziness or vertigo<br>Other ear and sense organ disorders<br>Other nervous system disorders<br>Heart valve disorders<br>Peri-; endo-; and myocarditis; cardiomyopathy (except that caused by tuberculosis or sexually transmitted disease)<br>Essential hypertension<br>Hypertension with complications and secondary hypertension<br>Pulmonary heart disease<br>Other and ill-defined heart disease<br>Peripheral and visceral atherosclerosis<br>Aortic; peripheral; and visceral artery aneurysms<br>Aortic and peripheral arterial embolism or thrombosis<br>Other circulatory disease<br>Varicose veins of lower extremity<br>Hemorrhoids<br>Other diseases of veins and lymphatics<br>Acute and chronic tonsillitis<br>Acute bronchitis<br>Other upper respiratory infections<br>Pleurisy; pneumothorax; pulmonary collapse<br>Respiratory failure; insufficiency; arrest (adult)<br>Lung disease due to external agents<br>Other lower respiratory disease<br>Other upper respiratory disease<br>Intestinal infection<br>Disorders of teeth and jaw<br>Diseases of mouth; excluding dental<br>Esophageal disorders<br>Gastritis and duodenitis<br>Other disorders of stomach and duodenum<br>Anal and rectal conditions<br>Peritonitis and intestinal abscess |

**eTable 1: Diagnostic Categories (continued)**

| <b>Category</b>           | <b>Clinical Classifications Software (CCS)<sup>37</sup> Components</b>                                                                                                                                                                                                                                                                                                                                                                                                                                                                                                                                                                                                                                                                                                                                                                                                                                                                                                                                                                                                                                                                                                                                                                                                                                                                                                                                                                             |
|---------------------------|----------------------------------------------------------------------------------------------------------------------------------------------------------------------------------------------------------------------------------------------------------------------------------------------------------------------------------------------------------------------------------------------------------------------------------------------------------------------------------------------------------------------------------------------------------------------------------------------------------------------------------------------------------------------------------------------------------------------------------------------------------------------------------------------------------------------------------------------------------------------------------------------------------------------------------------------------------------------------------------------------------------------------------------------------------------------------------------------------------------------------------------------------------------------------------------------------------------------------------------------------------------------------------------------------------------------------------------------------------------------------------------------------------------------------------------------------|
| Miscellaneous (continued) | Pancreatic disorders (not diabetes)<br>Noninfectious gastroenteritis<br>Other gastrointestinal disorders<br>Nephritis; nephrosis; renal sclerosis<br>Chronic renal failure<br>Other diseases of kidney and ureters<br>Other diseases of bladder and urethra<br>Genitourinary symptoms and ill-defined conditions<br>Inflammatory conditions of male genital organs<br>Other male genital disorders<br>Nonmalignant breast conditions<br>Inflammatory diseases of female pelvic organs<br>Endometriosis<br>Prolapse of female genital organs<br>Menstrual disorders<br>Ovarian cyst<br>Menopausal disorders<br>Female infertility<br>Other female genital disorders<br>Contraceptive and procreative management<br>Spontaneous abortion<br>Induced abortion<br>Postabortion complications<br>Ectopic pregnancy<br>Other complications of pregnancy<br>Hemorrhage during pregnancy; abruptio placenta; placenta previa<br>Hypertension complicating pregnancy; childbirth and the puerperium<br>Early or threatened labor<br>Prolonged pregnancy<br>Diabetes or abnormal glucose tolerance complicating pregnancy; childbirth; or the puerperium<br>Malposition; malpresentation<br>Fetopelvic disproportion; obstruction<br>Previous C-section<br>Fetal distress and abnormal forces of labor<br>Polyhydramnios and other problems of amniotic cavity<br>Umbilical cord complication<br>OB-related trauma to perineum and vulva<br>Forceps delivery |



**eTable 1: Diagnostic Categories (continued)**

| Category                  | Clinical Classifications Software (CCS) <sup>37</sup> Components                                                                                                                                                                                                                                                                                                                                                                                                                                                                                                                                                                                                                                                                                                                                                                                                                                                                                                                                                                                                                                                                                                                                                                                                                                                                                                                                                                                                                                                                                                                                                                          |
|---------------------------|-------------------------------------------------------------------------------------------------------------------------------------------------------------------------------------------------------------------------------------------------------------------------------------------------------------------------------------------------------------------------------------------------------------------------------------------------------------------------------------------------------------------------------------------------------------------------------------------------------------------------------------------------------------------------------------------------------------------------------------------------------------------------------------------------------------------------------------------------------------------------------------------------------------------------------------------------------------------------------------------------------------------------------------------------------------------------------------------------------------------------------------------------------------------------------------------------------------------------------------------------------------------------------------------------------------------------------------------------------------------------------------------------------------------------------------------------------------------------------------------------------------------------------------------------------------------------------------------------------------------------------------------|
| Miscellaneous (continued) | Other complications of birth; puerperium affecting management of mother<br>Normal pregnancy and/or delivery<br>Other inflammatory condition of skin<br>Chronic ulcer of skin<br>Other skin disorders<br>Infective arthritis and osteomyelitis (except that caused by tuberculosis or sexually transmitted disease)<br>Rheumatoid arthritis and related disease<br>Osteoarthritis<br>Other non-traumatic joint disorders<br>Spondylosis; intervertebral disc disorders; other back problems<br>Osteoporosis<br>Pathological fracture<br>Acquired foot deformities<br>Other acquired deformities<br>Systemic lupus erythematosus and connective tissue disorders<br>Other connective tissue disease<br>Other bone disease and musculoskeletal deformities<br>Cardiac and circulatory congenital anomalies<br>Digestive congenital anomalies<br>Genitourinary congenital anomalies<br>Nervous system congenital anomalies<br>Other congenital anomalies<br>Liveborn<br>Short gestation; low birth weight; and fetal growth retardation<br>Intrauterine hypoxia and birth asphyxia<br>Respiratory distress syndrome<br>Hemolytic jaundice and perinatal jaundice<br>Birth trauma<br>Other perinatal conditions<br>Fever of unknown origin<br>Lymphadenitis<br>Gangrene<br>Shock<br>Nausea and vomiting<br>Malaise and fatigue<br>Allergic reactions<br>Rehabilitation care; fitting of prostheses; and adjustment of devices<br>Administrative/social admission<br>Medical examination/evaluation<br>Other aftercare<br>Other screening for suspected conditions (not mental disorders or infectious disease)<br>Residual codes; unclassified |

**eTable 2: Hospital Characteristics for Analysis**<sup>29,44,45,46,56</sup>

| Hospital                | Inpatient Acute-care Sites                                                               | Size*<br>(beds) | Case Volume†<br>(discharges/y) |
|-------------------------|------------------------------------------------------------------------------------------|-----------------|--------------------------------|
| <b>Academic Sector</b>  |                                                                                          |                 |                                |
| Mt Sinai                | Mount Sinai Hospital                                                                     | 222             | 24,738                         |
| St Joseph's (H)         | St Joseph's Health Care System (Hamilton)                                                | 256             | 19,881                         |
| St Michael's            | St Michael's Hospital                                                                    | 402             | 24,954                         |
| Sunnybrook              | Sunnybrook Health Sciences Centre                                                        | 438             | 29,049                         |
| University              | University Health Network: Princess Margaret, Toronto General, and Toronto Western sites | 639             | 29,072                         |
| Hamilton                | Hamilton Health Sciences Corporation: General, Juravinski, and McMaster sites            | 559             | 39,849                         |
| <b>Community Sector</b> |                                                                                          |                 |                                |
| Markham                 | Markham Stouffville Hospital                                                             | 111             | 11,479                         |
| Joseph Brant            | Joseph Brant Memorial Hospital                                                           | 167             | 13,152                         |
| Halton                  | Halton Healthcare Services Corporation: Milton and Oakville sites                        | 188             | 16,731                         |
| York Central            | York Central Hospital                                                                    | 167             | 14,677                         |
| Rouge Valley            | Rouge Valley Health System: Centenary and Ajax sites                                     | 259             | 24,697                         |
| Credit Valley           | Credit Valley Hospital                                                                   | 208             | 21,186                         |
| Southlake               | Southlake Regional Health Centre                                                         | 164             | 16,080                         |
| St Joseph's (T)         | St Joseph's Health Centre (Toronto)                                                      | 259             | 17,681                         |
| Toronto East            | Toronto East General Hospital                                                            | 249             | 18,801                         |
| Lakeridge               | Lakeridge Health Corporation: Bowmanville, Oshawa, Port Perry, and Uxbridge sites        | 329             | 25,374                         |
| Scarborough             | Scarborough Hospital: General and Grace sites                                            | 453             | 34,570                         |
| William Osler           | William Osler Health System: Brampton, Etobicoke, and Georgetown sites                   | 343             | 40,856                         |
| Trillium                | Trillium Health Centre (Mississauga)                                                     | 328             | 30,693                         |
| North York              | North York General Hospital: General and Branson sites                                   | 255             | 27,137                         |
| Humber River            | Humber River Regional Hospital: Humber Memorial, Northwestern, and York-Finch sites      | 433             | 29,138                         |

\* Size reflects the number of medical and surgical adult acute care in-patient beds reported for the hospital in 2002.

† Case volume reflects the total number of separations reported for the hospital in 2002.

**eTable 3: Hospital Characteristics for Description\*** 29,44,45,46

| Hospital                | Established (year) | Religious Affiliation | Annual Budget (million \$CAD) | Average Length of Stay (days) | Myocardial Infarction 28-day Readmission Rate* (%) | Use of Clinical Information Technology† (%) | Patient Assessment of Quality of Care† (%) |
|-------------------------|--------------------|-----------------------|-------------------------------|-------------------------------|----------------------------------------------------|---------------------------------------------|--------------------------------------------|
| <b>Academic Sector</b>  |                    |                       |                               |                               |                                                    |                                             |                                            |
| Mt Sinai                | 1923               | Yes                   | 184                           | 6.0                           | 5.9                                                | 60.1                                        | 89.8                                       |
| St Joseph's (H)         | 1890               | Yes                   | 158                           | 6.7                           | 7.5                                                | 60.1                                        | 89.8                                       |
| St Michael's            | 1892               | Yes                   | 370                           | 7.0                           | 5.9                                                | 47.6                                        | 87.6                                       |
| Sunnybrook              | 1948               | No                    | 400                           | 8.0                           | 3.8                                                | 74.8                                        | 87.6                                       |
| University              | 1829               | No                    | 650                           | 7.5                           | 3.8                                                | 74.8                                        | 87.6                                       |
| Hamilton                | 1848               | No                    | 530                           | 7.9                           | 5.9                                                | 47.6                                        | 89.8                                       |
| <b>Community Sector</b> |                    |                       |                               |                               |                                                    |                                             |                                            |
| Markham                 | 1990               | No                    | 60                            | 6.0                           | 7.5                                                | 60.1                                        | 89.8                                       |
| Joseph Brant            | 1961               | No                    | 73                            | 6.6                           | 5.9                                                | 25.0                                        | 87.6                                       |
| Halton                  | 1949               | No                    | 132                           | 5.8                           | 10.1                                               | 60.1                                        | 89.8                                       |
| York Central            | 1963               | No                    | 77                            | 6.5                           | 7.5                                                | 60.1                                        | 82.0                                       |
| Rouge Valley            | 1954               | No                    | 189                           | 6.4                           | 7.5                                                | 47.6                                        | 87.6                                       |
| Credit Valley           | 1985               | No                    | 170                           | 7.5                           | 10.1                                               | 74.8                                        | 87.6                                       |
| Southlake               | 1922               | No                    | 98                            | 5.0                           | 10.1                                               | 47.6                                        | 92.2                                       |
| St Joseph's (T)         | 1921               | Yes                   | 142                           | 5.8                           | 7.5                                                | 47.6                                        | 87.6                                       |
| Toronto East            | 1929               | No                    | 127                           | 7.2                           | 5.9                                                | 60.1                                        | 85.8                                       |
| Lakeridge               | 1946               | No                    | 183                           | 5.6                           | 7.5                                                | 74.8                                        | 85.8                                       |
| Scarborough             | 1956               | Yes                   | 231                           | 6.6                           | 10.1                                               | 60.1                                        | 82.0                                       |
| William Osler           | 1961               | No                    | 165                           | 3.5                           | 5.9                                                | 74.8                                        | 82.0                                       |
| Trillium                | 1958               | No                    | 194                           | 6.0                           | 3.8                                                | 74.8                                        | 82.0                                       |
| North York              | 1957               | No                    | 254                           | 5.0                           | 3.8                                                | 60.1                                        | 87.6                                       |
| Humber River            | 1948               | No                    | 141                           | 6.6                           | 5.9                                                | 47.6                                        | 82.0                                       |

\* Data from study midpoint (2002 where possible, 2004 otherwise).

†Data reported as a range in the source rather than a point estimate. The midpoint of the reported range is presented here.

**eTable 4: Diagnostic Category Frequency for Primary Hospitalization**

| <b>Most Responsible Diagnosis for Primary Hospitalization</b> | <b>Original Hospital Readmission (n = 161,974)</b> | <b>Alternate Hospital Readmission (n = 36,175)</b> |
|---------------------------------------------------------------|----------------------------------------------------|----------------------------------------------------|
| Miscellaneous                                                 | 49,237 (30.4%)                                     | 10,652 (29.4%)                                     |
| Malignant neoplasm                                            | 19,590 (12.1%)                                     | 4,303 (11.9%)                                      |
| Injury                                                        | 10,666 (6.6%)                                      | 2,724 (7.5%)                                       |
| Acute coronary syndrome                                       | 9,000 (5.6%)                                       | 2,115 (5.8%)                                       |
| Heart failure                                                 | 9,258 (5.7%)                                       | 1,856 (5.1%)                                       |
| Pneumonia                                                     | 6,696 (4.1%)                                       | 1,588 (4.4%)                                       |
| Obstructive lung disease                                      | 6,742 (4.2%)                                       | 1,316 (3.6%)                                       |
| Chronic ischemic heart disease                                | 3,168 (2.0%)                                       | 2,440 (6.7%)                                       |
| Cardiac arrhythmia                                            | 4,318 (2.7%)                                       | 824 (2.3%)                                         |
| Cerebrovascular disease                                       | 3,708 (2.3%)                                       | 1,135 (3.1%)                                       |
| Biliary tract disease                                         | 4,172 (2.6%)                                       | 463 (1.3%)                                         |
| Intestinal obstruction                                        | 3,709 (2.3%)                                       | 465 (1.3%)                                         |
| Gastrointestinal hemorrhage                                   | 3,202 (2.0%)                                       | 597 (1.7%)                                         |
| Urinary tract infection                                       | 2,905 (1.8%)                                       | 761 (2.1%)                                         |
| Diabetes                                                      | 2,844 (1.8%)                                       | 674 (1.9%)                                         |
| Liver disease                                                 | 2,560 (1.6%)                                       | 531 (1.5%)                                         |
| Fluid and electrolyte imbalance                               | 2,223 (1.4%)                                       | 565 (1.6%)                                         |
| Nonspecific chest pain                                        | 2,013 (1.2%)                                       | 498 (1.4%)                                         |
| Nonspecific abdominal pain                                    | 1,868 (1.2%)                                       | 360 (1.0%)                                         |
| Acute renal failure                                           | 1,448 (0.9%)                                       | 373 (1.0%)                                         |
| Infections of the skin                                        | 1,484 (0.9%)                                       | 310 (0.9%)                                         |
| Sepsis                                                        | 1,491 (0.9%)                                       | 285 (0.8%)                                         |
| Appendicitis                                                  | 1,633 (1.0%)                                       | 97 (0.3%)                                          |
| Diverticular disease                                          | 1,480 (0.9%)                                       | 150 (0.4%)                                         |
| Venous thromboembolism                                        | 1,335 (0.8%)                                       | 221 (0.6%)                                         |
| Nephrolithiasis                                               | 1,419 (0.9%)                                       | 135 (0.4%)                                         |
| Inflammatory bowel disease                                    | 1,381 (0.9%)                                       | 172 (0.5%)                                         |
| Prostatic hypertrophy                                         | 1,225 (0.8%)                                       | 173 (0.5%)                                         |
| Syncope and collapse                                          | 947 (0.6%)                                         | 290 (0.8%)                                         |
| Cardiac arrest                                                | 252 (0.2%)                                         | 102 (0.3%)                                         |

**eTable 5: Diagnostic Category Frequency for Secondary Hospitalization**

| <b>Most Responsible Diagnosis for Secondary Hospitalization</b> | <b>Original Hospital Readmission<br/>(n = 161,974)</b> | <b>Alternate Hospital Readmission<br/>(n = 36,175)</b> |
|-----------------------------------------------------------------|--------------------------------------------------------|--------------------------------------------------------|
| Miscellaneous                                                   | 47,116 (29.1%)                                         | 10,362 (28.6%)                                         |
| Malignant neoplasm                                              | 13,085 (8.1%)                                          | 2,802 (7.7%)                                           |
| Injury                                                          | 20,194 (12.5%)                                         | 2,888 (8.0%)                                           |
| Acute coronary syndrome                                         | 6,648 (4.1%)                                           | 1,933 (5.3%)                                           |
| Heart failure                                                   | 10,193 (6.3%)                                          | 2,452 (6.8%)                                           |
| Pneumonia                                                       | 7,584 (4.7%)                                           | 2,264 (6.3%)                                           |
| Obstructive lung disease                                        | 5,855 (3.6%)                                           | 1,177 (3.3%)                                           |
| Chronic ischemic heart disease                                  | 1,599 (1.0%)                                           | 404 (1.1%)                                             |
| Cardiac arrhythmia                                              | 554 (0.3%)                                             | 203 (0.6%)                                             |
| Cerebrovascular disease                                         | 4,008 (2.5%)                                           | 1,398 (3.9%)                                           |
| Biliary tract disease                                           | 3,213 (2.0%)                                           | 511 (1.4%)                                             |
| Intestinal obstruction                                          | 4,830 (3.0%)                                           | 648 (1.8%)                                             |
| Gastrointestinal hemorrhage                                     | 3,624 (2.2%)                                           | 960 (2.7%)                                             |
| Urinary tract infection                                         | 3,370 (2.1%)                                           | 866 (2.4%)                                             |
| Diabetes                                                        | 2,606 (1.6%)                                           | 679 (1.9%)                                             |
| Liver disease                                                   | 2,618 (1.6%)                                           | 595 (1.6%)                                             |
| Fluid and electrolyte imbalance                                 | 2,799 (1.7%)                                           | 651 (1.8%)                                             |
| Nonspecific chest pain                                          | 3,149 (1.9%)                                           | 1,094 (3.0%)                                           |
| Nonspecific abdominal pain                                      | 2,306 (1.4%)                                           | 320 (0.9%)                                             |
| Acute renal failure                                             | 1,853 (1.1%)                                           | 490 (1.4%)                                             |
| Infections of the skin                                          | 1,399 (0.9%)                                           | 277 (0.8%)                                             |
| Sepsis                                                          | 2,805 (1.7%)                                           | 788 (2.2%)                                             |
| Appendicitis                                                    | 336 (0.2%)                                             | 61 (0.2%)                                              |
| Diverticular disease                                            | 1,033 (0.6%)                                           | 149 (0.4%)                                             |
| Venous thromboembolism                                          | 2,426 (1.5%)                                           | 605 (1.7%)                                             |
| Nephrolithiasis                                                 | 1,053 (0.7%)                                           | 110 (0.3%)                                             |
| Inflammatory bowel disease                                      | 909 (0.6%)                                             | 150 (0.4%)                                             |
| Prostatic hypertrophy                                           | 201 (0.1%)                                             | 17 (0.0%)                                              |
| Syncope and collapse                                            | 988 (0.6%)                                             | 373 (1.0%)                                             |
| Cardiac arrest                                                  | 554 (0.3%)                                             | 203 (0.6%)                                             |

**eTable 6: Secondary Hospital Characteristics**

| Characteristic*                                                                                                     | Original Hospital Readmission<br>(n = 161,974) | Alternate Hospital Readmission<br>(n = 36,175) |
|---------------------------------------------------------------------------------------------------------------------|------------------------------------------------|------------------------------------------------|
| <b>For Analysis</b>                                                                                                 |                                                |                                                |
| Academic sector<br>(percent)                                                                                        | 36                                             | 33                                             |
| Average adult acute-care medical and surgical<br>beds<br>(count)                                                    | 328                                            | 328                                            |
| Average annual case volume<br>(patient discharges per year)                                                         | 27,196                                         | 26,160                                         |
| <b>For Description</b>                                                                                              |                                                |                                                |
| Average year of establishment<br>(year)                                                                             | 1948                                           | 1948                                           |
| Religious affiliation<br>(percent)                                                                                  | 21                                             | 24                                             |
| Average annual budget<br>(million \$CAD)                                                                            | 183                                            | 183                                            |
| Average length of stay<br>(days)                                                                                    | 7                                              | 7                                              |
| Average 28-day readmission rate following<br>discharge after acute myocardial infarction<br>(rate per 100 patients) | 5.9                                            | 5.9                                            |
| Average use of clinical information technology<br>(percent)                                                         | 60                                             | 60                                             |
| Average patient rating of global quality<br>(percent)                                                               | 88                                             | 88                                             |

\* Data represent the distribution of characteristics within the population of readmissions, rather than the distribution of characteristics within all qualifying GTHA hospitals. Reported averages are medians.

**eTable 7: Primary Outcome Stratified by Secondary Hospital**

| Hospital                  | Sample Size<br>(count) | Unadjusted Odds<br>Ratio<br>(95% CI) | Adjusted Odds<br>Ratio*<br>(95% CI) |
|---------------------------|------------------------|--------------------------------------|-------------------------------------|
| <b>Academic Sector</b>    |                        |                                      |                                     |
| Mt Sinai                  | 6,535                  | 1.57 (1.36 – 1.80)                   | 1.17 (1.00 – 1.38)                  |
| St Joseph's (H)           | 7,726                  | 1.52 (1.31 – 1.77)                   | 1.22 (1.02 – 1.45)                  |
| St Michael's              | 9,744                  | 1.63 (1.43 – 1.85)                   | 1.24 (1.07 – 1.44)                  |
| Sunnybrook                | 10,110                 | 1.57 (1.40 – 1.77)                   | 1.23 (1.08 – 1.41)                  |
| University                | 15,335                 | 1.44 (1.30 – 1.60)                   | 1.20 (1.07 – 1.35)                  |
| Hamilton                  | 19,758                 | 1.42 (1.26 – 1.60)                   | 1.14 (0.99 – 1.31)                  |
| <b>Community Sector</b>   |                        |                                      |                                     |
| Markham <sup>†</sup>      | 3,723                  | 1.05 (0.88 – 1.27)                   | 0.82 (0.66 – 1.03)                  |
| Joseph Brant <sup>†</sup> | 6,397                  | 0.92 (0.76 – 1.12)                   | 0.90 (0.72 -1.13)                   |
| Halton <sup>†</sup>       | 6,736                  | 1.03 (0.87 – 1.23)                   | 0.98 (0.79 – 1.21)                  |
| York Central              | 6,913                  | 1.32 (1.15 – 1.52)                   | 1.15 (0.97 – 1.35)                  |
| Rouge Valley              | 7,096                  | 1.06 (0.93 – 1.21)                   | 0.89 (0.77 – 1.04)                  |
| Credit Valley             | 7,371                  | 1.17 (1.02 – 1.35)                   | 0.97 (0.83 – 1.14)                  |
| Southlake                 | 8,405                  | 0.92 (0.78 – 1.09)                   | 0.88 (0.72 – 1.07)                  |
| St Joseph's (T)           | 9,057                  | 1.19 (1.06 – 1.35)                   | 1.06 (0.91 – 1.22)                  |
| Toronto East              | 9,455                  | 1.21 (1.07 – 1.36)                   | 1.10 (0.95 – 1.27)                  |
| Lakeridge                 | 9,472                  | 0.86 (0.74 – 1.00)                   | 1.00 (0.84 – 1.18)                  |
| Scarborough               | 10,072                 | 1.10 (0.99 – 1.23)                   | 0.92 (0.81 – 1.04)                  |
| William Osler             | 10,534                 | 1.20 (1.07 – 1.35)                   | 0.97 (0.84 – 1.11)                  |
| Trillium                  | 10,770                 | 1.25 (1.11 – 1.41)                   | 1.12 (0.97 – 1.29)                  |
| North York                | 10,965                 | 1.28 (1.14 – 1.42)                   | 1.11 (0.98 – 1.26)                  |
| Humber River              | 11,975                 | 1.35 (1.22 – 1.49)                   | 0.99 (0.88 – 1.11)                  |
| <b>Overall</b>            | <b>198,149</b>         | <b>1.26 (1.23 – 1.30)</b>            | <b>-</b>                            |

\* Adjusted odds ratios for hospital-specific strata were generated using multivariate logistic regression and were adjusted for age, sex, neighborhood household income, rural residence, year of readmission, Charlson comorbidity score, primary length of stay, most responsible diagnosis at secondary hospitalization, arrival by ambulance at readmission, chronic care facility residency at readmission, hospitalizations in prior year, physician clinic visits in prior year, and hospital-free interval.

†Multivariate logistic regression produced unstable adjusted odds ratios for these hospitals due to model nonconvergence.

**eTable 8: Diagnosis as Predictor of 30-day Mortality**

| <b>Most Responsible Diagnosis for Secondary Hospitalization</b> | <b>Adjusted Odds Ratio* (95% CI)</b> |
|-----------------------------------------------------------------|--------------------------------------|
| Miscellaneous                                                   | Reference                            |
| Malignant neoplasm                                              | 3.57 (3.16 – 4.03)                   |
| Injury                                                          | 0.45 (0.41 – 0.48)                   |
| Acute coronary syndrome                                         | 1.05 (0.94 – 1.16)                   |
| Heart failure                                                   | 0.91 (0.83 – 1.01)                   |
| Pneumonia                                                       | 1.87 (1.69 – 2.07)                   |
| Obstructive lung disease                                        | 0.93 (0.85 – 1.02)                   |
| Chronic ischemic heart disease                                  | 0.67 (0.59 – 0.76)                   |
| Cardiac arrhythmia                                              | 0.45 (0.41 – 0.50)                   |
| Cerebrovascular disease                                         | 1.27 (1.13 – 1.42)                   |
| Biliary tract disease                                           | 0.53 (0.49 – 0.58)                   |
| Intestinal obstruction                                          | 0.60 (0.55 – 0.65)                   |
| Gastrointestinal hemorrhage                                     | 0.76 (0.70 – 0.82)                   |
| Urinary tract infection                                         | 0.57 (0.52 – 0.62)                   |
| Diabetes                                                        | 0.52 (0.47 – 0.58)                   |
| Liver disease                                                   | 2.29 (2.03 – 2.59)                   |
| Fluid and electrolyte imbalance                                 | 0.81 (0.73 – 0.90)                   |
| Nonspecific chest pain                                          | 0.26 (0.24 – 0.28)                   |
| Nonspecific abdominal pain                                      | 0.40 (0.36 – 0.43)                   |
| Acute renal failure                                             | 1.40 (1.24 – 1.58)                   |
| Infections of the skin                                          | 0.43 (0.40 – 0.46)                   |
| Sepsis                                                          | 3.10 (2.72 – 3.53)                   |
| Appendicitis                                                    | 0.54 (0.46 – 0.63)                   |
| Diverticular disease                                            | 0.61 (0.55 – 0.68)                   |
| Venous thromboembolism                                          | 0.76 (0.69 – 0.85)                   |
| Nephrolithiasis                                                 | 0.44 (0.41 – 0.47)                   |
| Inflammatory bowel disease                                      | 0.50 (0.46 – 0.55)                   |
| Prostatic hypertrophy                                           | 0.24 (0.20 – 0.29)                   |
| Syncope and collapse                                            | 0.24 (0.22 – 0.27)                   |
| Cardiac arrest                                                  | 7.23 (5.70 – 9.18)                   |

\*As with Table 2, odds ratios were adjusted for age, sex, neighborhood household income, rural residence, year of readmission, Charlson comorbidity score, primary length of stay, most responsible diagnosis at secondary hospitalization, arrival by ambulance at readmission, chronic care facility residency at readmission, hospitalizations in prior year, physician clinic visits in prior year, hospital-free interval, and secondary hospital case volume and sector. Variables were treated as continuous for analysis.



**eTable 9: Analysis of Sector Transitions and the Comparative Odds of 30-day Mortality Following Readmission**

| Hospital Sector Transition Comparison      | Adjusted Odds Ratio (95% CI) |
|--------------------------------------------|------------------------------|
| <b>Relatively Simple Comparisons</b>       |                              |
| AA(alternate) vs AA(original) <sup>a</sup> | 1.19 (1.12 – 1.26)           |
| CC(alternate) vs CC(original) <sup>b</sup> | 1.04 (1.00 – 1.07)           |
| <b>More Complicated Comparisons</b>        |                              |
| AC(alternate) vs AA(original) <sup>c</sup> | 1.52 (1.31 – 1.75)           |
| CA(alternate) vs CC(original) <sup>d</sup> | 0.74 (0.63 – 0.86)           |
| AA(original) vs CC(original) <sup>e</sup>  | 0.64 (0.55 – 0.75)           |

In the notation used here to express sector transitions, the first letter represents the sector of the primary hospital (A = Academic; C = Community), the second letter represents the sector of the secondary hospital, and the subscript indicates alternate- or original-hospital readmission. To perform the exploratory sector transition analysis, we created a six-level categorical term describing all possible sector transitions [i.e. AA(original), AA(alternate), AC(alternate), CA(alternate), CC(alternate), CC(original)]. The multivariate logistic regression model with generalized estimating equations used for the primary analysis was modified by removing the term for hospital sector and replacing the alternate-hospital readmission term used for the primary outcome with the categorical term for sector transition. The odds ratios listed for each comparison express the relative risk of 30-day mortality.

Within the academic sector (<sup>a</sup>) alternate-hospital readmission is associated with an increased risk of death, but within the community sector (<sup>b</sup>) the effect is only marginally significant. This finding is similar to the results of the analysis that stratified on secondary hospital sector (see page 10 of manuscript) and suggests that the association between alternate-hospital readmission and death is modified by hospital sector.

The remainder of the results listed above can be interpreted as follows: For patients initially admitted to an academic sector hospital, readmission to an alternate academic (<sup>a</sup>) or community hospital (<sup>c</sup>) is associated with an increased risk of death compared to readmission to the original academic hospital. For patients initially admitted to a community sector hospital, readmission to an alternate community hospital is associated with a risk of death that is not significantly different than the risk associated with readmission to the original hospital (<sup>b</sup>), yet readmission to academic hospital is associated with lower risk than returning to the original hospital (<sup>d</sup>). Original hospital readmissions within the academic sector are associated with a lower risk of death than original hospital readmissions within the community sector (<sup>e</sup>).

Adjusted odds ratios presented here were adjusted for age, sex, neighborhood household income, rural residence, year of readmission, Charlson comorbidity score, primary length of stay, most responsible diagnosis at secondary hospitalization, arrival by ambulance at readmission, chronic care facility residency at readmission, hospitalizations in prior year, physician clinic visits in prior year, hospital-free interval, and secondary hospital case volume and sector.

**eTable 10: Unadjusted Comparison of the Odds of 30-day Mortality Following Alternate-Hospital Readmission to the Odds of 30-day Mortality Following Original-Hospital Readmission, Stratified on Diagnosis**

| Most Responsible Diagnosis for Secondary Hospitalization | Unadjusted Odds Ratio (95% CI) |
|----------------------------------------------------------|--------------------------------|
| Miscellaneous                                            | 1.26 (1.19 - 1.33)             |
| Malignant neoplasm                                       | 1.22 (1.10 - 1.36)             |
| Injury                                                   | 2.27 (1.72 - 2.99)             |
| Acute coronary syndrome                                  | 0.93 (0.80 - 1.07)             |
| Heart failure                                            | 0.96 (0.87 - 1.06)             |
| Pneumonia                                                | 1.08 (0.97 - 1.19)             |
| Obstructive lung disease                                 | 1.03 (0.87 - 1.22)             |
| Chronic ischemic heart disease                           | 0.52 (0.35 - 0.76)             |
| Cardiac arrhythmia                                       | 0.97 (0.76 - 1.24)             |
| Cerebrovascular disease                                  | 1.20 (1.01 - 1.43)             |
| Biliary tract disease                                    | 1.00 (0.61 - 1.64)             |
| Intestinal obstruction                                   | 1.80 (1.32 - 2.45)             |
| Gastrointestinal hemorrhage                              | 1.03 (0.79 - 1.33)             |
| Urinary tract infection                                  | 1.38 (1.14 - 1.67)             |
| Diabetes                                                 | 0.93 (0.70 - 1.24)             |
| Liver disease                                            | 1.12 (0.91 - 1.37)             |
| Fluid and electrolyte imbalance                          | 1.12 (0.91 - 1.38)             |
| Nonspecific chest pain                                   | 0.75 (0.29 - 1.90)             |
| Nonspecific abdominal pain                               | 1.61 (0.61 - 4.23)             |
| Acute renal failure                                      | 1.32 (1.08 - 1.60)             |
| Infections of the skin                                   | 1.53 (1.00 - 2.35)             |
| Sepsis                                                   | 1.21 (1.02 - 1.43)             |
| Appendicitis *                                           | -                              |
| Diverticular disease                                     | 2.25 (1.43 - 3.55)             |
| Venous thromboembolism                                   | 0.89 (0.67 - 1.19)             |
| Nephrolithiasis *                                        | -                              |
| Inflammatory bowel disease *                             | -                              |
| Prostatic hypertrophy *                                  | -                              |
| Syncope and collapse                                     | 0.64 (0.25 - 1.63)             |
| Cardiac arrest                                           | 1.12 (0.78 - 1.6)              |

\* Effect estimates for these diagnoses could not be calculated as there were no deaths in the alternate-hospital group.

**eTable 11: Adjusted Comparison of the Odds of Mortality Following Alternate-Hospital Readmission to the Odds of Mortality Following Original-Hospital Readmission at Additional Time Points**

| Outcome                                | Adjusted Odds Ratio* (95%CI) |
|----------------------------------------|------------------------------|
| Death during secondary hospitalization | 1.05 (1.02 – 1.09)           |
| Death within 90 days                   | 1.04 (0.99 – 1.10)           |
| Death within 180 days                  | 1.03 (0.97 – 1.09)           |
| Death within one year                  | 1.01 (0.95 – 1.07)           |

\* Adjusted for age, sex, neighborhood household income, rural residence, year of readmission, Charlson comorbidity score, primary length of stay, most responsible diagnosis at secondary hospitalization, arrival by ambulance at readmission, chronic care facility residency at readmission , hospitalizations in prior year, physician clinic visits in prior year, hospital-free interval, and secondary hospital case volume and sector.

**eTable 12: Odds Ratio for Death Within 30 Days of Readmission in the Presence of an Unmeasured Confounder With a Hazard Ratio of 2.0 for Death and Various Prevalence Levels of the Confounder, by Exposure Group**

|                                                              | Prevalence of Risk Factor in Original-Hospital Readmissions |             |             |             |             |             |
|--------------------------------------------------------------|-------------------------------------------------------------|-------------|-------------|-------------|-------------|-------------|
|                                                              | 0.0                                                         | 0.1         | 0.2         | 0.3         | 0.4         | 0.5         |
| Prevalence of Risk Factor in Alternate-Hospital Readmissions |                                                             |             |             |             |             |             |
| 0.0                                                          | 1.00                                                        | 0.89        | 0.80        | 0.72        | 0.65        | 0.59        |
| 0.1                                                          | <b>1.13</b>                                                 | 1.00        | 0.90        | 0.81        | 0.73        | 0.66        |
| 0.2                                                          | <b>1.26</b>                                                 | <b>1.12</b> | 1.00        | 0.90        | 0.82        | 0.74        |
| 0.3                                                          | <b>1.40</b>                                                 | <b>1.24</b> | <b>1.11</b> | 1.00        | 0.91        | 0.82        |
| 0.4                                                          | <b>1.54</b>                                                 | <b>1.37</b> | <b>1.23</b> | <b>1.10</b> | 1.00        | 0.91        |
| 0.5                                                          | <b>1.69</b>                                                 | <b>1.50</b> | <b>1.35</b> | <b>1.21</b> | <b>1.10</b> | 1.00        |
| 0.6                                                          | <b>1.85</b>                                                 | <b>1.65</b> | <b>1.47</b> | <b>1.33</b> | <b>1.20</b> | <b>1.09</b> |
| 0.7                                                          | <b>2.02</b>                                                 | <b>1.80</b> | <b>1.61</b> | <b>1.45</b> | <b>1.31</b> | <b>1.19</b> |
| 0.8                                                          | <b>2.20</b>                                                 | <b>1.96</b> | <b>1.75</b> | <b>1.58</b> | <b>1.43</b> | <b>1.30</b> |
| 0.9                                                          | <b>2.39</b>                                                 | <b>2.12</b> | <b>1.90</b> | <b>1.71</b> | <b>1.55</b> | <b>1.41</b> |
| 1.0                                                          | <b>2.59</b>                                                 | <b>2.30</b> | <b>2.06</b> | <b>1.86</b> | <b>1.68</b> | <b>1.53</b> |

eFigure 1: Study Schematic

## Appendix Figure 1: Study Schematic

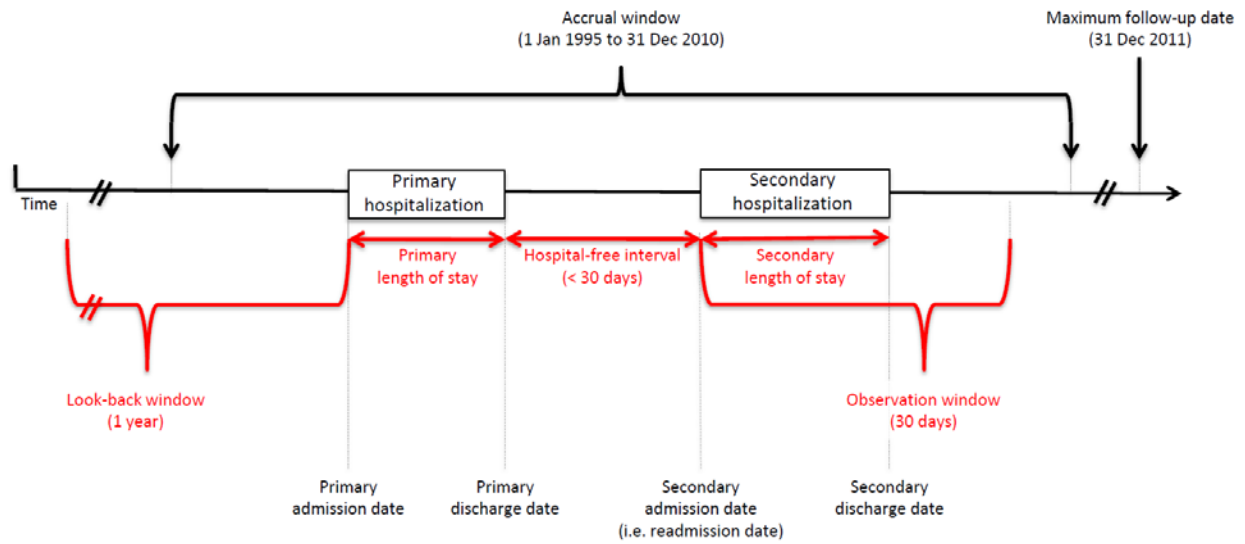

eFigure 2: Hospital Flow Diagram

## Appendix Figure 2: Hospital Flow Diagram

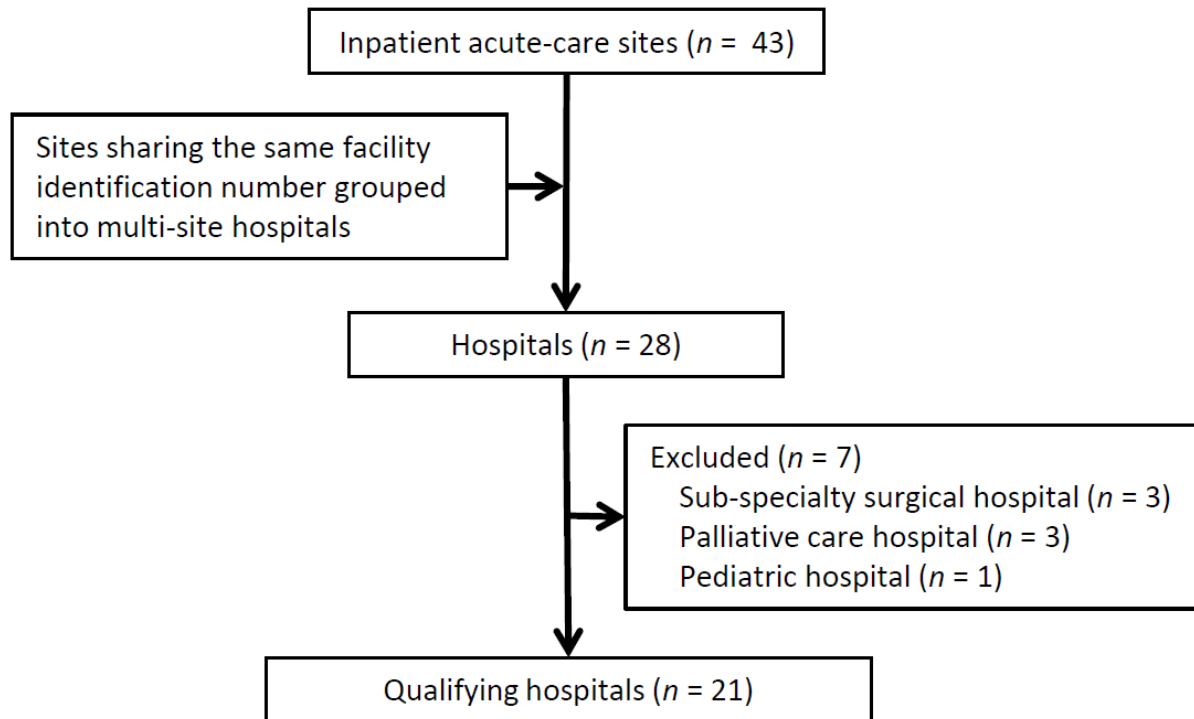

**eFigure 3: Frequency Graph for Eligible Readmissions**

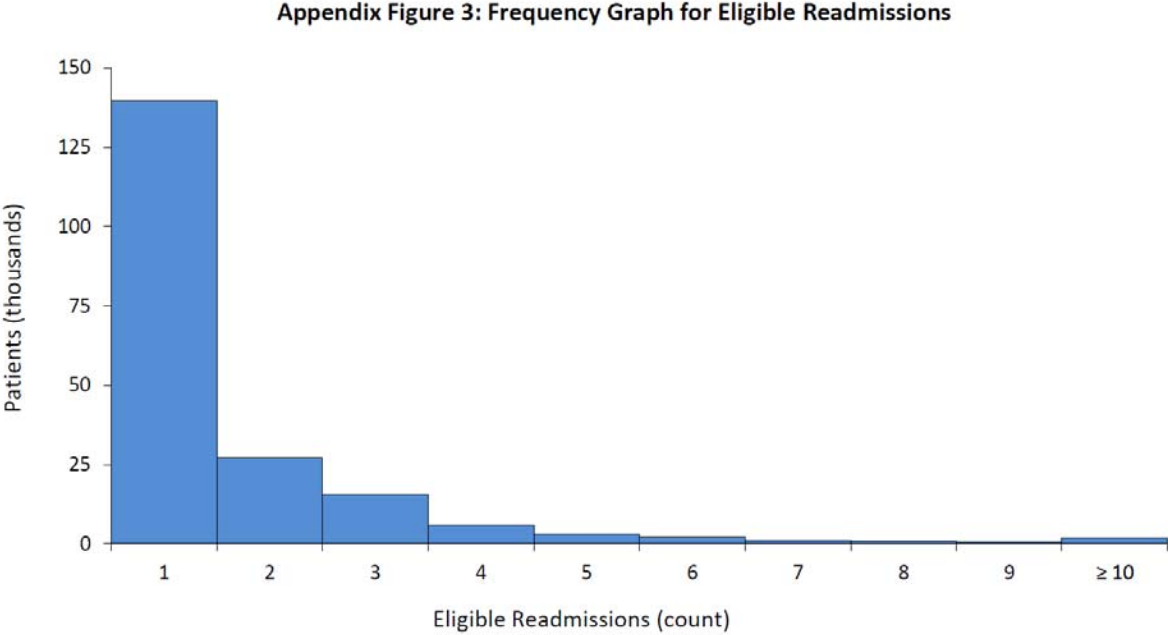

## eFigure 4: Comparing Primary and Secondary Hospital Stratification

Appendix Figure 4a: Unadjusted Odds Ratio for 30-day Mortality, Stratified by Secondary Hospital

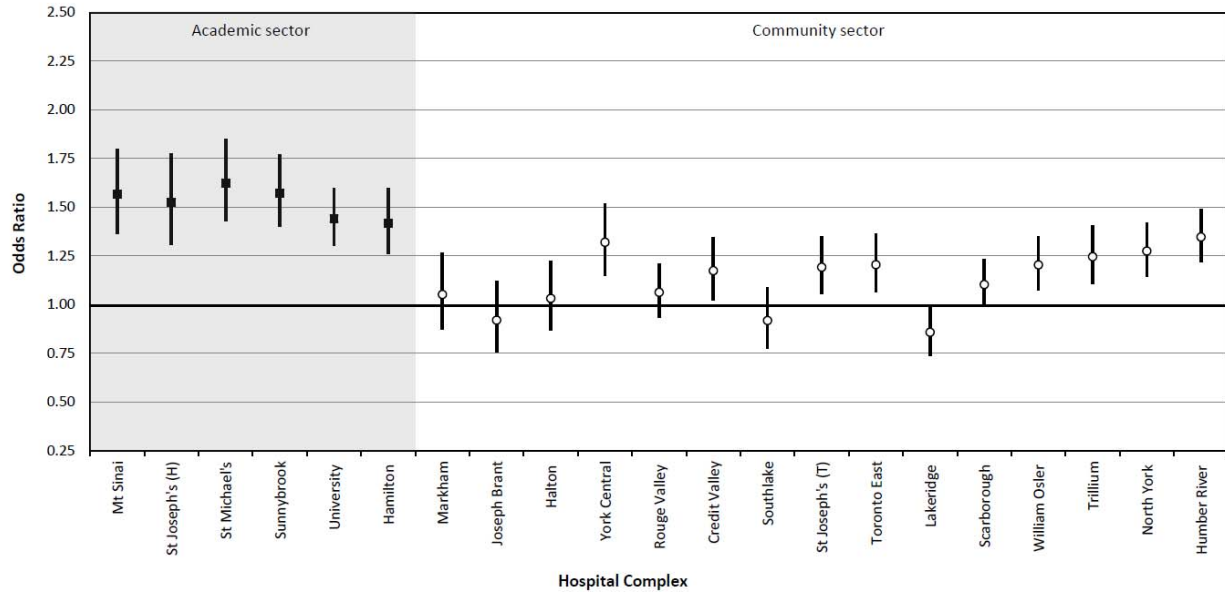

Appendix Figure 4b: Unadjusted Odds Ratio for 30-day Mortality, Stratified by Primary Hospital

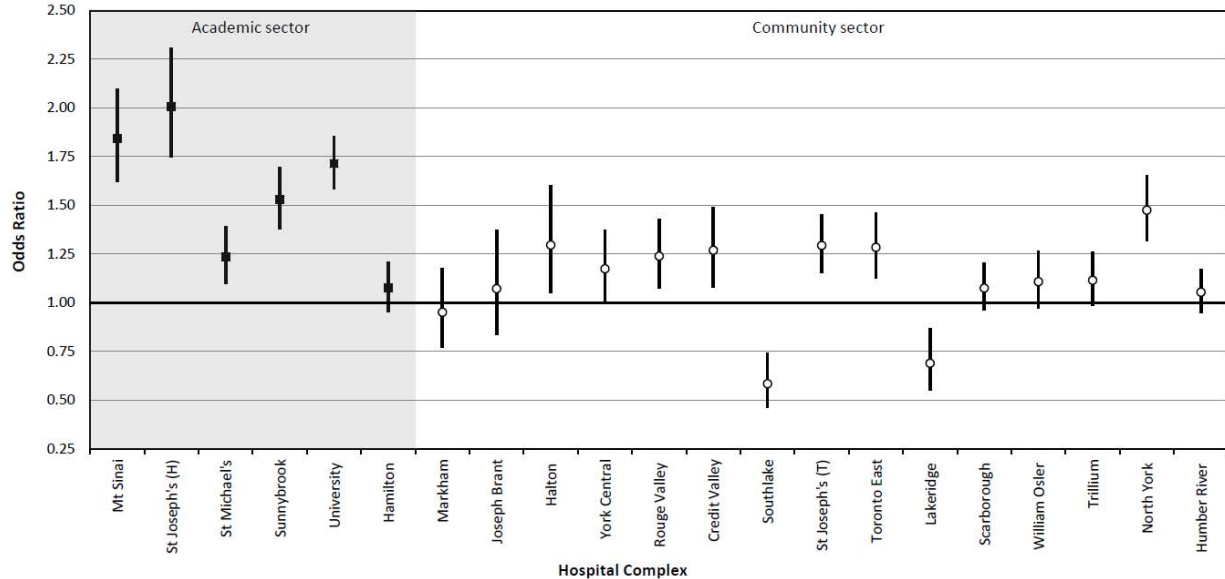

Legend: Data points represent the hospital-specific odds ratio comparing the odds of death within 30 days of alternate-hospital readmission to the odds of death within 30 days of original-hospital readmission. In eFigure 3a, patients were assigned to their secondary (ie readmission) hospital. In eFigure 3b, patients were assigned to their primary (ie admission) hospital. Black square data points indicate academic sector hospitals. White circle data points indicate community sector hospitals. Vertical lines represent the 95% confidence interval for the associated data point.

Odds Ratios presented in Appendix Figure 4b were adjusted for age, sex, neighborhood household income, rural residence, year of readmission, Charlson comorbidity score, primary length of stay, most responsible diagnosis at secondary hospitalization, arrival by ambulance at readmission, chronic care facility residency at readmission, hospitalizations in prior year, physician clinic visits in prior year, and hospital-free interval.
